# Supplementary material for: Anchored plasticity opens doors for selective inhibitor design in nitric oxide synthase
Source: Springer Nature journal article supplement (doi:10.1038/nchembio.115), 2008-10-12
Supplement: 41589_2008_BFnchembio115_MOESM1_ESM.mol [file 41589_2008_BFnchembio115_MOESM1_ESM.mol]

  Chem3D  09260810523D

 27 29  0  0  0  0  0  0  0  0999 V2000
    0.3763    1.3983    0.1420 C   0  0  0  0  0  0  0  0  0  0  0  0
    1.5580    0.6381    0.2033 C   0  0  0  0  0  0  0  0  0  0  0  0
    1.4591   -0.7511    0.6702 C   0  0  0  0  0  0  0  0  0  0  0  0
    0.3479   -1.3125    1.0661 N   0  0  0  0  0  0  0  0  0  0  0  0
   -0.8934   -0.5159    1.1015 C   0  0  1  0  0  0  0  0  0  0  0  0
   -0.8085    0.8355    0.5518 N   0  0  0  0  0  0  0  0  0  0  0  0
    0.3799    2.7271   -0.3359 C   0  0  0  0  0  0  0  0  0  0  0  0
    1.5736    3.3043   -0.7377 C   0  0  0  0  0  0  0  0  0  0  0  0
    2.7630    2.5598   -0.6676 C   0  0  0  0  0  0  0  0  0  0  0  0
    2.7651    1.2471   -0.2090 C   0  0  0  0  0  0  0  0  0  0  0  0
   -2.0144   -1.2454    0.4038 C   0  0  0  0  0  0  0  0  0  0  0  0
   -3.6548   -1.1867    0.9225 S   0  0  0  0  0  0  0  0  0  0  0  0
   -4.1607   -2.1997   -0.3623 C   0  0  0  0  0  0  0  0  0  0  0  0
   -3.1137   -2.5654   -1.1634 C   0  0  0  0  0  0  0  0  0  0  0  0
   -1.8807   -2.0119   -0.7244 C   0  0  0  0  0  0  0  0  0  0  0  0
    2.6043   -1.5183    0.6753 N   0  0  0  0  0  0  0  0  0  0  0  0
    3.9179    0.6001   -0.1760 F   0  0  0  0  0  0  0  0  0  0  0  0
   -1.1473   -0.3997    2.1822 H   0  0  0  0  0  0  0  0  0  0  0  0
   -1.6749    1.4232    0.4852 H   0  0  0  0  0  0  0  0  0  0  0  0
   -0.5570    3.3055   -0.3840 H   0  0  0  0  0  0  0  0  0  0  0  0
    1.5916    4.3421   -1.1076 H   0  0  0  0  0  0  0  0  0  0  0  0
    3.7096    3.0268   -0.9866 H   0  0  0  0  0  0  0  0  0  0  0  0
   -5.2033   -2.5080   -0.5142 H   0  0  0  0  0  0  0  0  0  0  0  0
   -3.2138   -3.2102   -2.0469 H   0  0  0  0  0  0  0  0  0  0  0  0
   -0.9254   -2.1829   -1.2397 H   0  0  0  0  0  0  0  0  0  0  0  0
    2.5670   -2.5168    0.9968 H   0  0  0  0  0  0  0  0  0  0  0  0
    3.5184   -1.1124    0.3594 H   0  0  0  0  0  0  0  0  0  0  0  0
  1  2  2  0      
  6  1  1  0      
  1  7  1  0      
  2  3  1  0      
 10  2  1  0      
  3  4  2  0      
  3 16  1  0      
  4  5  1  0      
  5  6  1  0      
  5 11  1  0      
  5 18  1  0      
  6 19  1  0      
  7  8  2  0      
  7 20  1  0      
  8  9  1  0      
  8 21  1  0      
  9 10  2  0      
  9 22  1  0      
 10 17  1  0      
 11 12  1  0      
 15 11  2  0      
 12 13  1  0      
 13 14  2  0      
 13 23  1  0      
 14 15  1  0      
 14 24  1  0      
 15 25  1  0      
 16 26  1  0      
 16 27  1  0      
M  END
