# Supplementary material for: Anchored plasticity opens doors for selective inhibitor design in nitric oxide synthase
Source: Springer Nature journal article supplement (doi:10.1038/nchembio.115), 2008-10-12
Supplement: 41589_2008_BFnchembio115_MOESM27_ESM.mol [file 41589_2008_BFnchembio115_MOESM27_ESM.mol]

  Chem3D  09260810533D

 22 23  0  0  0  0  0  0  0  0999 V2000
   -0.9994   -0.4774   -0.0370 C   0  0  0  0  0  0  0  0  0  0  0  0
   -0.9509    0.9033    0.0050 C   0  0  0  0  0  0  0  0  0  0  0  0
   -2.2078    1.4467    0.4047 C   0  0  0  0  0  0  0  0  0  0  0  0
   -3.1932    0.5237    0.6111 C   0  0  0  0  0  0  0  0  0  0  0  0
   -2.6016   -1.0438    0.3366 S   0  0  0  0  0  0  0  0  0  0  0  0
    0.0600   -1.4522   -0.3654 C   0  0  0  0  0  0  0  0  0  0  0  0
    1.2068   -1.2035   -0.9186 N   0  0  0  0  0  0  0  0  0  0  0  0
    1.5297    0.1708   -1.3250 C   0  0  0  0  0  0  0  0  0  0  0  0
    1.3967    1.2181   -0.2239 C   0  0  1  0  0  0  0  0  0  0  0  0
    0.1074    1.7423   -0.1876 O   0  0  0  0  0  0  0  0  0  0  0  0
   -0.1765   -2.7768   -0.0257 N   0  0  0  0  0  0  0  0  0  0  0  0
    1.8720    0.7770    1.1601 C   0  0  0  0  0  0  0  0  0  0  0  0
   -2.3713    2.5264    0.5372 H   0  0  0  0  0  0  0  0  0  0  0  0
   -4.2220    0.7479    0.9191 H   0  0  0  0  0  0  0  0  0  0  0  0
    2.5973    0.1545   -1.6557 H   0  0  0  0  0  0  0  0  0  0  0  0
    0.9401    0.4483   -2.2299 H   0  0  0  0  0  0  0  0  0  0  0  0
    2.0389    2.0889   -0.5209 H   0  0  0  0  0  0  0  0  0  0  0  0
    0.5520   -3.5040   -0.2318 H   0  0  0  0  0  0  0  0  0  0  0  0
   -1.0702   -3.0726    0.4368 H   0  0  0  0  0  0  0  0  0  0  0  0
    1.8482    1.6274    1.8799 H   0  0  0  0  0  0  0  0  0  0  0  0
    2.9209    0.4042    1.1143 H   0  0  0  0  0  0  0  0  0  0  0  0
    1.2472   -0.0336    1.5941 H   0  0  0  0  0  0  0  0  0  0  0  0
  2  1  2  0      
  5  1  1  0      
  1  6  1  0      
  2  3  1  0      
 10  2  1  0      
  3  4  2  0      
  3 13  1  0      
  4  5  1  0      
  4 14  1  0      
  6  7  2  0      
  6 11  1  0      
  7  8  1  0      
  8  9  1  0      
  8 15  1  0      
  8 16  1  0      
  9 10  1  0      
  9 12  1  0      
  9 17  1  0      
 11 18  1  0      
 11 19  1  0      
 12 20  1  0      
 12 21  1  0      
 12 22  1  0      
M  END
