# Supplementary material for: Anchored plasticity opens doors for selective inhibitor design in nitric oxide synthase
Source: Springer Nature journal article supplement (doi:10.1038/nchembio.115), 2008-10-12
Supplement: 41589_2008_BFnchembio115_MOESM31_ESM.mol [file 41589_2008_BFnchembio115_MOESM31_ESM.mol]

  Chem3D  09260810533D

 42 45  0  0  0  0  0  0  0  0999 V2000
   -1.3301   -1.8975    4.7157 C   0  0  0  0  0  0  0  0  0  0  0  0
   -1.8805   -0.6404    4.5572 C   0  0  0  0  0  0  0  0  0  0  0  0
   -2.9548   -0.4306    5.4718 C   0  0  0  0  0  0  0  0  0  0  0  0
   -3.2461   -1.5038    6.2647 C   0  0  0  0  0  0  0  0  0  0  0  0
   -2.1990   -2.7967    5.9248 S   0  0  0  0  0  0  0  0  0  0  0  0
   -0.2010   -2.5269    4.0010 C   0  0  0  0  0  0  0  0  0  0  0  0
    0.3396   -2.1330    2.8892 N   0  0  0  0  0  0  0  0  0  0  0  0
   -0.2040   -0.9531    2.1872 C   0  0  1  0  0  0  0  0  0  0  0  0
   -0.2346    0.2625    3.1119 C   0  0  0  0  0  0  0  0  0  0  0  0
   -1.4765    0.3770    3.7433 O   0  0  0  0  0  0  0  0  0  0  0  0
    0.3582   -3.6539    4.5862 N   0  0  0  0  0  0  0  0  0  0  0  0
    0.6817   -0.7144    0.9528 C   0  0  0  0  0  0  0  0  0  0  0  0
    0.0884    0.2664    0.1422 O   0  0  0  0  0  0  0  0  0  0  0  0
    0.6273    0.5102   -1.0957 C   0  0  0  0  0  0  0  0  0  0  0  0
   -0.1502    1.1795   -2.0509 C   0  0  0  0  0  0  0  0  0  0  0  0
    0.2823    1.4466   -3.3542 C   0  0  0  0  0  0  0  0  0  0  0  0
    1.5523    1.0116   -3.7499 C   0  0  0  0  0  0  0  0  0  0  0  0
    2.3395    0.3182   -2.8268 C   0  0  0  0  0  0  0  0  0  0  0  0
    1.8810    0.0607   -1.5340 C   0  0  0  0  0  0  0  0  0  0  0  0
   -0.6311    2.1756   -4.3103 C   0  0  0  0  0  0  0  0  0  0  0  0
    0.1072    2.6923   -5.4598 N   0  0  0  0  0  0  0  0  0  0  0  0
    0.9309    1.6677   -6.0950 C   0  0  0  0  0  0  0  0  0  0  0  0
    2.0649    1.2720   -5.1438 C   0  0  0  0  0  0  0  0  0  0  0  0
   -3.5046    0.5201    5.5335 H   0  0  0  0  0  0  0  0  0  0  0  0
   -4.0367   -1.5367    7.0256 H   0  0  0  0  0  0  0  0  0  0  0  0
   -1.2266   -1.2175    1.8214 H   0  0  0  0  0  0  0  0  0  0  0  0
    0.5822    0.2467    3.8680 H   0  0  0  0  0  0  0  0  0  0  0  0
   -0.1146    1.2028    2.5257 H   0  0  0  0  0  0  0  0  0  0  0  0
    1.1654   -4.1366    4.1200 H   0  0  0  0  0  0  0  0  0  0  0  0
   -0.0091   -4.0395    5.4897 H   0  0  0  0  0  0  0  0  0  0  0  0
    0.7577   -1.6609    0.3669 H   0  0  0  0  0  0  0  0  0  0  0  0
    1.6934   -0.3784    1.2772 H   0  0  0  0  0  0  0  0  0  0  0  0
   -1.1616    1.5068   -1.7568 H   0  0  0  0  0  0  0  0  0  0  0  0
    3.3384   -0.0390   -3.1261 H   0  0  0  0  0  0  0  0  0  0  0  0
    2.5479   -0.5039   -0.8644 H   0  0  0  0  0  0  0  0  0  0  0  0
   -1.1235    3.0315   -3.7927 H   0  0  0  0  0  0  0  0  0  0  0  0
   -1.4282    1.4734   -4.6504 H   0  0  0  0  0  0  0  0  0  0  0  0
    0.7330    3.4696   -5.1322 H   0  0  0  0  0  0  0  0  0  0  0  0
    1.3556    2.0668   -7.0463 H   0  0  0  0  0  0  0  0  0  0  0  0
    0.3054    0.7818   -6.3569 H   0  0  0  0  0  0  0  0  0  0  0  0
    2.8083    2.1021   -5.0792 H   0  0  0  0  0  0  0  0  0  0  0  0
    2.5899    0.3710   -5.5394 H   0  0  0  0  0  0  0  0  0  0  0  0
  2  1  2  0      
  5  1  1  0      
  1  6  1  0      
  2  3  1  0      
 10  2  1  0      
  3  4  2  0      
  3 24  1  0      
  4  5  1  0      
  4 25  1  0      
  6  7  2  0      
  6 11  1  0      
  7  8  1  0      
  8  9  1  0      
  8 12  1  0      
  8 26  1  0      
  9 10  1  0      
  9 27  1  0      
  9 28  1  0      
 11 29  1  0      
 11 30  1  0      
 12 13  1  0      
 12 31  1  0      
 12 32  1  0      
 13 14  1  0      
 14 15  2  0      
 19 14  1  0      
 15 16  1  0      
 15 33  1  0      
 16 17  2  0      
 16 20  1  0      
 17 18  1  0      
 23 17  1  0      
 18 19  2  0      
 18 34  1  0      
 19 35  1  0      
 20 21  1  0      
 20 36  1  0      
 20 37  1  0      
 21 22  1  0      
 21 38  1  0      
 22 23  1  0      
 22 39  1  0      
 22 40  1  0      
 23 41  1  0      
 23 42  1  0      
M  END
